# Supplementary material for: Estrogen and retinoic acid antagonistically regulate several microRNA genes to control aerobic glycolysis in breast cancer cells
Source: Royal Society of Chemistry journal article supplement (doi:10.1039/c2mb25298h), 2012-09-21
Supplement: c2mb25298h2.pdf [file c2mb25298h2.pdf]

## Supplementary information

### Figure S1. Expression of BAMBI and BTG2 upon estrogen and retinoic acid treatments.

RT-qPCRs directed against BAMBI and BTG2 performed on total RNAs extracted from MCF-7 cells treated for 3 hours with vehicle (v), 10nM estradiol (E2), 100nM RAR agonists AM580/CD437 (RA) or a mixture of E2 (10nM) and AM580/CD437 (100nM) (RA+E2).

### Figure S2. Probing the functional consequences of the E2/RA antagonism on miRNA genes

(A) Functional annotation of the validated targets of the miR-23a/24-2, miR-210 (orange) and miR-17/92, miR-424/450b (blue) with the GeneGo Pathway maps algorithm. (B) Functional annotation of the validated targets of the miR-23a/24-2, miR-210 (orange) and miR-17/92, miR-424/450b (blue) with the GeneGo Metabolic Networks algorithm. (C) Functional annotation of the genes down-regulated by RA and up-regulated by E2 according to <sup>1</sup> with the GeneGo Pathway maps algorithm. (D) Functional annotation of the genes down-regulated by RA and up-regulated by E2 according to <sup>1</sup> with the GeneGo Metabolic Networks.

### Figure S3. RA perturbs mitochondrial activity and respiration in MCF-7 cells.

Response of oxygen consumption rate (OCR) measured in real-time after injection of oligomycin, FCCP, rotenone and antimycin using a Seahorse Bioscience XF24 extracellular flux analyzer (see materials and methods for details). Data shown are the average of 3 independent experiments. Indicated results were first normalized to protein concentration then to the baseline at the time point prior to compound injections.

### Figure S4. Effect of estrogen and retinoic acid on MDA-MB-231 cells and primary HMEC.

(A) Extracellular lactate production measured in the supernatant of MDA-MB-231 cells and HMEC after 48 hours of the indicated treatments. (B) RT-qPCRs directed against the indicated miRNAs performed on total RNAs extracted from MDA-MB-231 cells and HMEC treated for 3 hours with 10nM E2, 100nM AM580/CD437 or a mixture of E2 (10nM) and AM580/CD437 (100nM). (C) Cell morphology of MCF-7 and MDA-MB-231 cells after 3 days treatment with RA agonists (top). Measure of Annexin V (bottom). (D) Western blot directed against ESR1 in HMEC, MDA-MB-231 and MCF-7 cells. The tubulin was also revealed to assess control loading.

**Figure S5. Gene expression levels in breast tumors.** The mean expression level of the indicated genes was calculated over the main molecular subgroups characterized in <sup>2</sup> (CIT) and <sup>3</sup> (NKI). For each gene, non-parametric Kruskal-Wallis tests indicated that  $p < 0.0001$ . Information about the expression of RXRB and RXRG are not available in the NKI dataset <sup>3</sup>.

**Figure S6. c-Myc-centered network regulating cell metabolism.** c-Myc is able to repress the miR-23a/24-2 transcription <sup>4</sup> while the miR-24 inhibits c-Myc expression <sup>5</sup> (feed-back loop, FBL). Concomitantly, c-Myc induces the expression of LDHA at both the transcriptional <sup>6,7</sup> and post-transcriptional levels (feed-forward loop, FFL).

**Supplementary Table S1.** List of primers used in this study

**Supplementary Table S2.** List of all potential ESR1 binding sites (independently of the score used in MIR@NT@N) located in the sequences upstream the miR-23a/24-2, miR-210, miR-17/92 and miR-424/450b.

**Supplementary Table S3.** Description of the reverse engineering approach used to predict E2/RA regulation of miRNA genes from expression profiles of predicted targets.

**Supplementary Table S4.** Validated targets of the miR-23a/24-2, miR-210, miR-17/92 and miR-424/450b extracted from the miRTarBase database.

**Supplementary Table S5.** Functional annotation of the genes down-regulated by RA and up-regulated by E2 using the DAVID resource.

## References

1. S. Hua, R. Kittler and K. P. White, *Cell*, 2009, 137, 1259-1271.
2. M. Guedj, L. Marisa, A. de Reynies, B. Orsetti, R. Schiappa, F. Bibeau, G. Macgrogan, F. Lerebours, P. Finetti, M. Longy, P. Bertheau, F. Bertrand, F. Bonnet, A. L. Martin, J. P. Feugeas, I. Bieche, J. Lehmann-Che, R. Lidereau, D. Birnbaum, F. Bertucci, H. de The and C. Theillet, *Oncogene*, 2011.
3. C. Fan, D. S. Oh, L. Wessels, B. Weigelt, D. S. Nuyten, A. B. Nobel, L. J. van't Veer and C. M. Perou, *N Engl J Med*, 2006, 355, 560-569.
4. P. Gao, I. Tchernyshyov, T. C. Chang, Y. S. Lee, K. Kita, T. Ochi, K. I. Zeller, A. M. De Marzo, J. E. Van Eyk, J. T. Mendell and C. V. Dang, *Nature*, 2009, 458, 762-765.
5. A. Lal, F. Navarro, C. A. Maher, L. E. Maliszewski, N. Yan, E. O'Day, D. Chowdhury, D. M. Dykxhoorn, P. Tsai, O. Hofmann, K. G. Becker, M. Gorospe, W. Hide and J. Lieberman, *Mol Cell*, 2009, 35, 610-625.
6. H. Shim, C. Dolde, B. C. Lewis, C. S. Wu, G. Dang, R. A. Jungmann, R. Dalla-Favera and C. V. Dang, *Proc Natl Acad Sci U S A*, 1997, 94, 6658-6663.
7. B. C. Lewis, H. Shim, Q. Li, C. S. Wu, L. A. Lee, A. Maity and C. V. Dang, *Mol Cell Biol*, 1997, 17, 4967-4978.

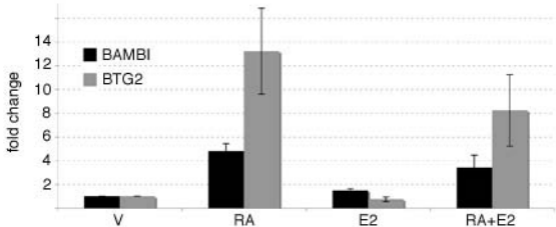

Saumet et al., Figure S1

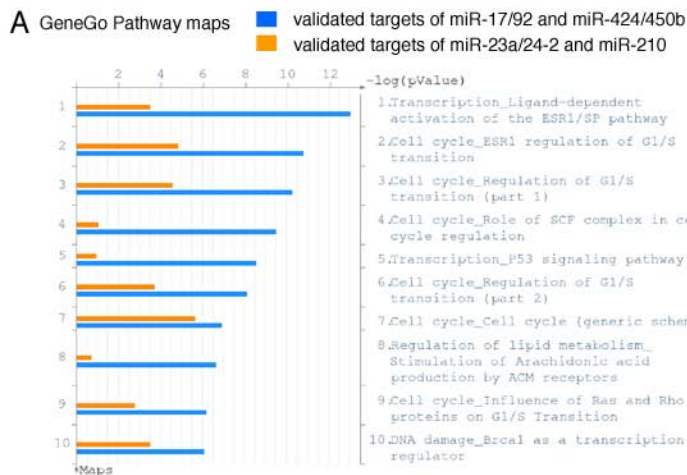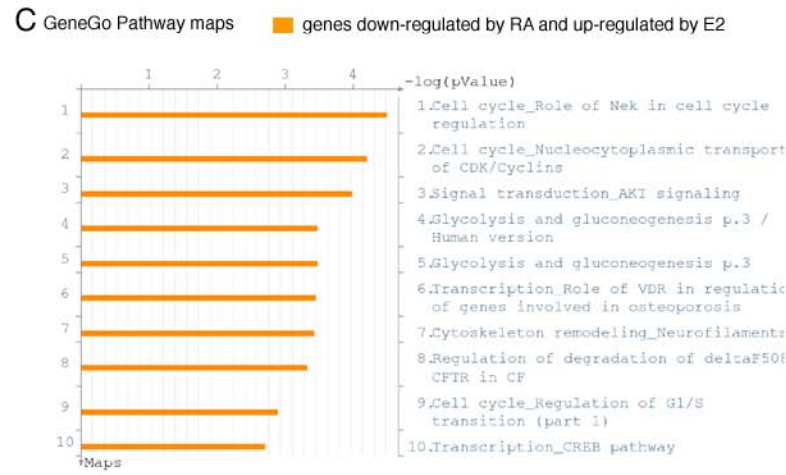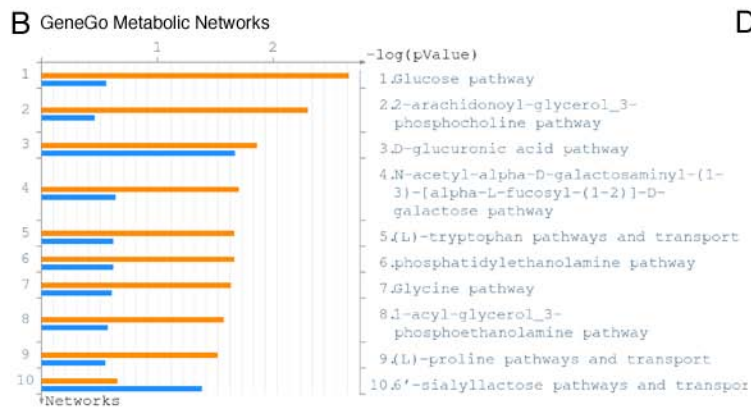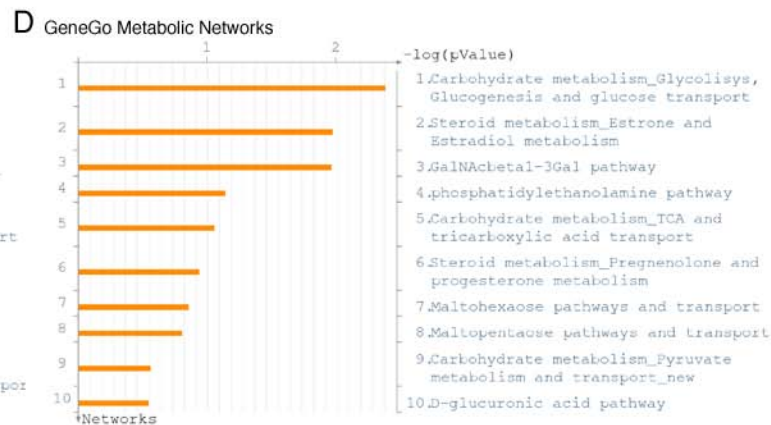

|         | Basal       |   |     | Proton Leak  |   |     | ATP        |   |     | Maximal      |   |     |
|---------|-------------|---|-----|--------------|---|-----|------------|---|-----|--------------|---|-----|
|         | Respiration |   |     | (pMoles/min) |   |     | Production |   |     | (pMoles/min) |   |     |
|         | MEAN        | ± | SEM | MEAN         | ± | SEM | MEAN       | ± | SEM | MEAN         | ± | SEM |
| vehicle | 34          | ± | 1   | 20           | ± | 2   | 14         | ± | 1   | 46           | ± | 4   |
| RA      | 27          | ± | 1   | 17           | ± | 1   | 9          | ± | 0   | 27           | ± | 2   |
| E2      | 34          | ± | 3   | 21           | ± | 1   | 13         | ± | 2   | 44           | ± | 4   |
| RA + E2 | 24          | ± | 1   | 15           | ± | 0   | 9          | ± | 1   | 23           | ± | 1   |

Saumet et al., Figure S3

A

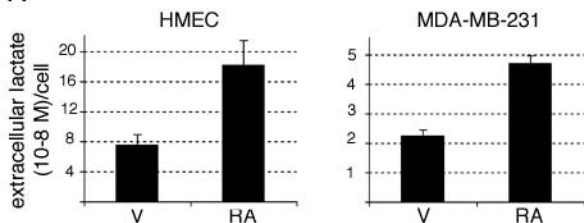

B

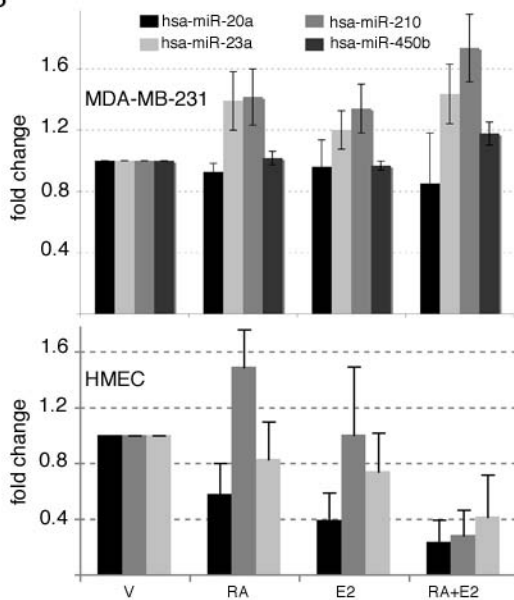

C

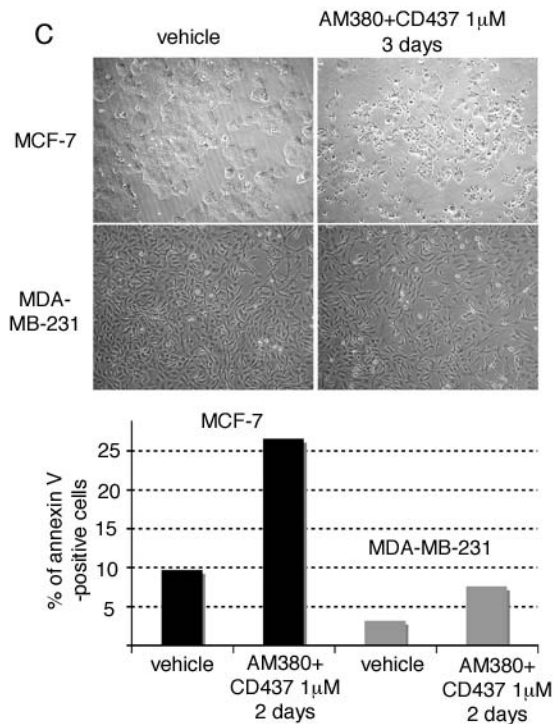

D

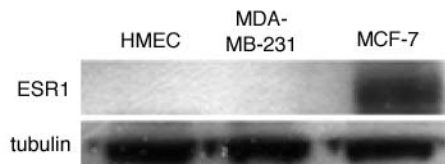

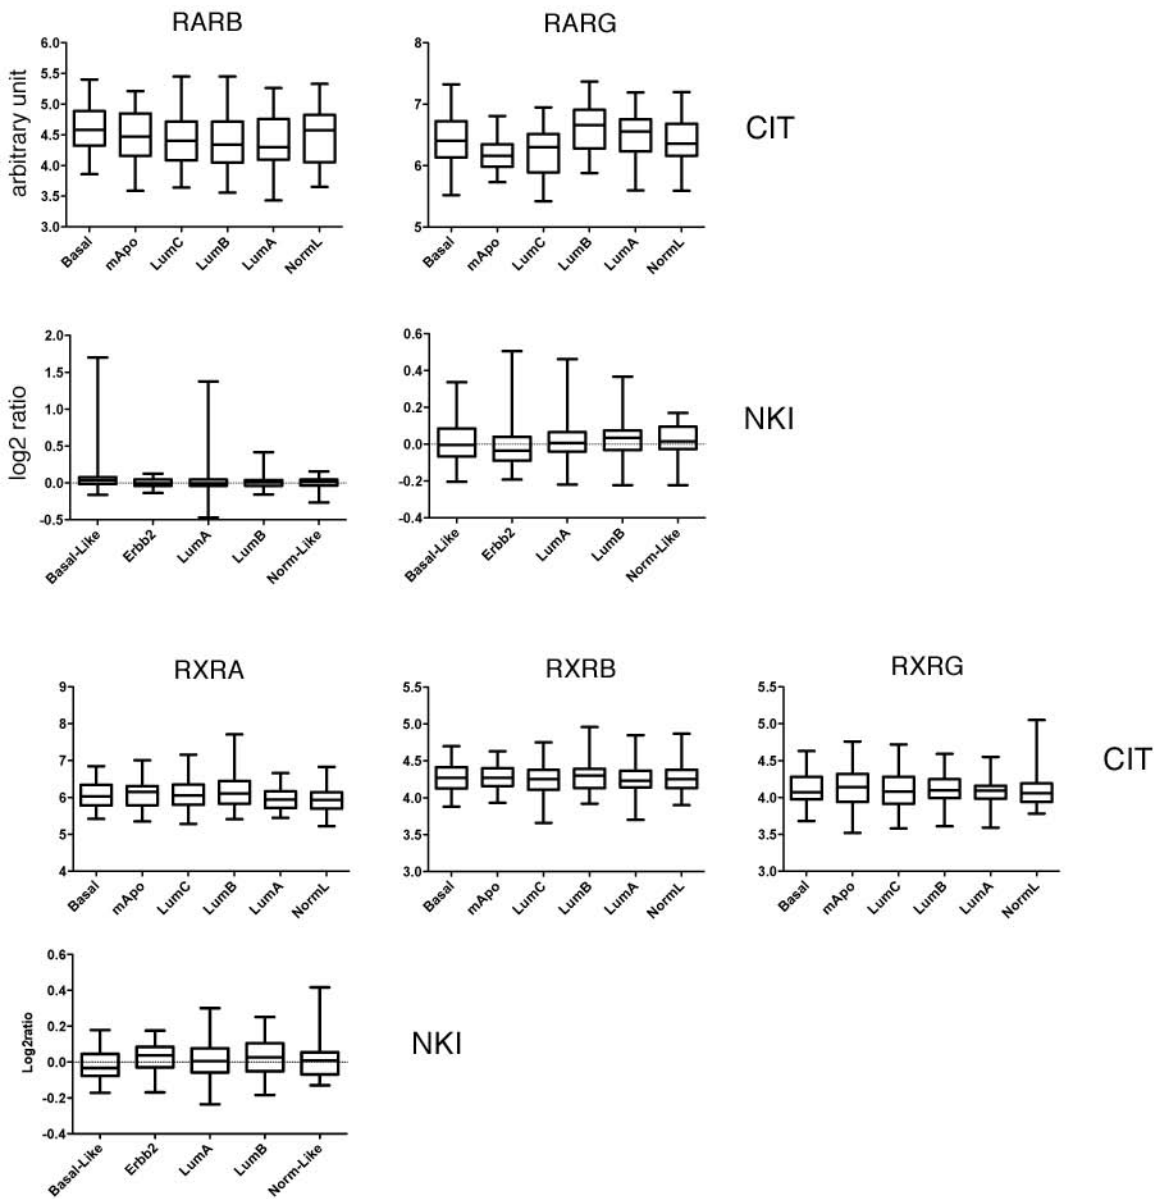



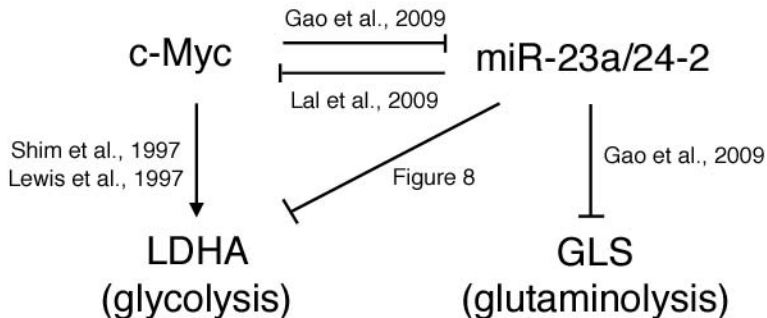

### Feed-Back Loop

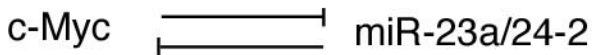

### Feed-Forward Loop

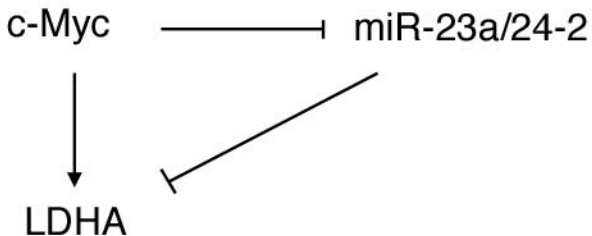

Saumet et al., Figure S6
