# Supplementary material for: Estrogen and retinoic acid antagonistically regulate several microRNA genes to control aerobic glycolysis in breast cancer cells
Source: Royal Society of Chemistry journal article supplement (doi:10.1039/c2mb25298h), 2012-09-21
Supplement: c2mb25298h5.pdf [file c2mb25298h5.pdf]

|                        |                    |                    |                    |                       |                       |              |               |
|------------------------|--------------------|--------------------|--------------------|-----------------------|-----------------------|--------------|---------------|
| hsa-miR-103            |                    |                    |                    |                       |                       |              |               |
| hsa-miR-105            | hsa-miR-767        | hsa-miR-105        |                    |                       |                       |              |               |
| hsa-miR-106b           | hsa-miR-93         | hsa-miR-25         |                    |                       |                       |              |               |
| hsa-miR-107            |                    |                    |                    |                       |                       |              |               |
| <b>hsa-miR-1180</b>    |                    |                    |                    |                       |                       |              |               |
| hsa-miR-1304           |                    |                    |                    |                       |                       |              |               |
| hsa-miR-15a            | hsa-miR-16         |                    |                    |                       |                       |              |               |
| hsa-miR-185            |                    |                    |                    |                       |                       |              |               |
| hsa-miR-18a*           | hsa-miR-17         | hsa-miR-19a        | hsa-miR-20a        | hsa-miR-19b           | hsa-miR-92            |              |               |
| hsa-miR-200b           | hsa-miR-200a       | hsa-miR-429        |                    |                       |                       |              |               |
| <b>hsa-miR-20a</b>     | <b>hsa-miR-17</b>  | <b>hsa-miR-19a</b> | <b>hsa-miR-18a</b> | <b>hsa-miR-19b</b>    | <b>hsa-miR-92</b>     |              |               |
| hsa-miR-20b            | hsa-miR-106a       | hsa-miR-18b        | hsa-miR-19b        | hsa-miR-92            | hsa-miR-363           |              |               |
| hsa-miR-27a            | hsa-miR-23a        | hsa-miR-24         |                    |                       |                       |              |               |
| hsa-miR-27b            | hsa-miR-23b        | hsa-miR-24         |                    |                       |                       |              |               |
| hsa-miR-30c-1*         | hsa-miR-30e        |                    |                    |                       |                       |              |               |
| hsa-miR-30c-2*         |                    |                    |                    |                       |                       |              |               |
| hsa-miR-32             |                    |                    |                    |                       |                       |              |               |
| hsa-miR-339-5p         |                    |                    |                    |                       |                       |              |               |
| hsa-miR-361-3p         |                    |                    |                    |                       |                       |              |               |
| <b>hsa-miR-450b-5p</b> | <b>hsa-miR-424</b> | <b>hsa-miR503</b>  | <b>hsa-miR-542</b> | <b>hsa-miR-450a-1</b> | <b>hsa-miR-450a-1</b> |              |               |
| hsa-miR-492            |                    |                    |                    |                       |                       |              |               |
| hsa-miR-520a-3p        | hsa-miR-520f       | hsa-miR-515        | hsa-miR-519c       | hsa-miR-1283-1        | hsa-miR-526b          | hsa-miR-519b | hsa-miR-525   |
| hsa-miR-520b           | hsa-miR-526b       | hsa-miR-519b       | hsa-miR-525        | hsa-miR-523           | hsa-miR-518f          | hsa-miR-518b | hsa-miR-526a- |
| hsa-miR-520c-3p        | hsa-miR-526b       | hsa-miR-519b       | hsa-miR-525        | hsa-miR-523           | hsa-miR-518f          | hsa-miR-518b | hsa-miR-526a- |
| hsa-miR-520d-3p        | hsa-miR-524        | hsa-miR-517a       | hsa-miR-519d       | hsa-miR-521-2         | hsa-miR-517b          | hsa-miR-520g | hsa-miR-516b- |
| hsa-miR-520e           | hsa-miR-512-1      | hsa-miR-512-2      | hsa-miR-1323       | hsa-miR-498           | hsa-miR-515-1         | hsa-miR-519e | hsa-miR-520f  |
| hsa-miR-520f           | hsa-miR-520a       | hsa-miR-515        | hsa-miR-519c       | hsa-miR-1283-1        | hsa-miR-526b          | hsa-miR-519b | hsa-miR-525   |
| hsa-miR-545*           | hsa-miR-374a       |                    |                    |                       |                       |              |               |
| hsa-miR-559            |                    |                    |                    |                       |                       |              |               |
| hsa-miR-590-3p         |                    |                    |                    |                       |                       |              |               |
| hsa-miR-624            |                    |                    |                    |                       |                       |              |               |
| hsa-miR-650            |                    |                    |                    |                       |                       |              |               |
| hsa-miR-888            | hsa-miR-891b       | hsa-miR-892b       | hsa-miR-892a       | hsa-miR-890           |                       |              |               |
| hsa-miR-944            |                    |                    |                    |                       |                       |              |               |

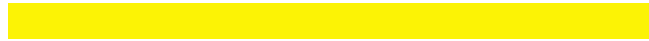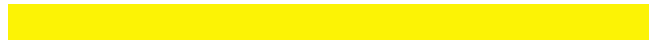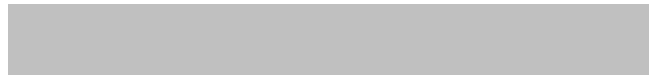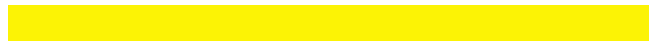

hsa-miR-523      hsa-miR-518f  
hsa-miR-520c    hsa-miR-518c    hsa-miR-524  
hsa-miR-520b    hsa-miR-518c    hsa-miR-524  
hsa-miR-526a-2    hsa-miR-518e  
hsa-miR-515-2  
hsa-miR-523      hsa-miR-518f
